# Supplementary material for: Alcohol or Benzodiazepine Co-involvement With Opioid Overdose Deaths in the United States, 1999-2017
Source: PubMed Central journal article supplement (PMC7146101; doi:10.1001/jamanetworkopen.2020.2361), 2020-04-09
Supplement: jamanetwopen-3-e202361-s001.pdf [file jamanetwopen-3-e202361-s001.pdf]

## Supplementary Online Content

Tori ME, LaRochelle MR, Naimi TS. Alcohol or benzodiazepine co-involvement with opioid overdose deaths in the United States, 1999-2017. *JAMA Netw Open*. 2020;3(4):e202361. doi:10.1001/jamanetworkopen.2020.2361

**eTable.** State-Specific Rates of Alcohol and Benzodiazepine Co-involvement, 2015-2017

This supplementary material has been provided by the authors to give readers additional information about their work.

**eTable. State-Specific Rates of Alcohol and Benzodiazepine Co-involvement, 2015-2017**

|                      | All Opioid Overdose Deaths | Crude Death Rate per 100,000 | Alcohol Co-involvement Deaths | Alcohol Co-involvement Prevalence | Percent Binge Drinking <sup>a</sup> , 2015-2017 | Benzodiazepine Co-involvement Deaths | Benzodiazepine Co-involvement Prevalence | Benzodiazepine Prescription per 100 persons <sup>b</sup> , 2012 |
|----------------------|----------------------------|------------------------------|-------------------------------|-----------------------------------|-------------------------------------------------|--------------------------------------|------------------------------------------|-----------------------------------------------------------------|
| Alabama              | 1047                       | 7.2                          | 124                           | 11.1%                             | 11.6%                                           | 208                                  | 19.1%                                    | 61.9                                                            |
| Alaska               | 282                        | 12.7                         | 71                            | 24.5%                             | 20.4%                                           | 70                                   | 23.4%                                    | 24.0                                                            |
| Arizona              | 2368                       | 11.4                         | 289                           | 11.8%                             | 14.2%                                           | 548                                  | 22.4%                                    | 34.3                                                            |
| Arkansas             | 560                        | 6.2                          | 65                            | 10.9%                             | 14.1%                                           | 260                                  | 45.5%                                    | 50.8                                                            |
| California           | 6229                       | 5.3                          | 869                           | 13.3%                             | 16.5%                                           | 1354                                 | 20.7%                                    | 25.4                                                            |
| Colorado             | 1609                       | 9.7                          | 238                           | 14.2%                             | 17.6%                                           | 263                                  | 16.2%                                    | 28.0                                                            |
| Connecticut          | 2495                       | 23.2                         | 639                           | 25.4%                             | 16.9%                                           | 746                                  | 29.5%                                    | 46.2                                                            |
| Delaware             | 537                        | 18.8                         | 60                            | 10.8%                             | 14.9%                                           | 29                                   | 5.4%                                     | 41.5                                                            |
| District of Columbia | 551                        | 26.9                         | 160                           | 28.7%                             | 27.2%                                           | 39                                   | 6.7%                                     | 38.4                                                            |
| Florida              | 7881                       | 12.7                         | 1048                          | 13.0%                             | 15.6%                                           | 1774                                 | 22.2%                                    | 46.9                                                            |
| Georgia              | 2790                       | 9                            | 332                           | 11.6%                             | 15.3%                                           | 755                                  | 26.4%                                    | 37.0                                                            |
| Hawaii               | 192                        | 4.5                          | 28                            | 14.6%                             | 18.9%                                           | 68                                   | 32.8%                                    | 19.3                                                            |
| Idaho                | 312                        | 6.2                          | 31                            | 9.3%                              | 14.1%                                           | 56                                   | 17.6%                                    | 29.1                                                            |

|               |      |      |      |       |       |      |       |      |
|---------------|------|------|------|-------|-------|------|-------|------|
| Illinois      | 5530 | 14.4 | 1041 | 18.4% | 20.2% | 1028 | 18.2% | 34.2 |
| Indiana       | 2505 | 12.6 | 259  | 9.6%  | 15.7% | 539  | 20.8% | 42.9 |
| Iowa          | 559  | 5.9  | 89   | 14.7% | 19.8% | 142  | 24.0% | 37.3 |
| Kansas        | 440  | 5    | 41   | 7.5%  | 15.6% | 90   | 19.8% | 38.9 |
| Kentucky      | 3034 | 22.8 | 326  | 10.4% | 15.3% | 1042 | 33.5% | 57.4 |
| Louisiana     | 1048 | 7.5  | 120  | 11.0% | 17.3% | 230  | 21.5% | 51.4 |
| Maine         | 899  | 22.5 | 218  | 23.8% | 17.6% | 249  | 27.4% | 40.7 |
| Maryland      | 4893 | 27.1 | 1127 | 22.7% | 14.2% | 327  | 6.6%  | 29.9 |
| Massachusetts | 5453 | 26.6 | 1133 | 20.5% | 17.7% | 799  | 14.4% | 48.8 |
| Michigan      | 5104 | 17.1 | 651  | 12.4% | 18.5% | 1016 | 19.5% | 45.5 |
| Minnesota     | 1156 | 7    | 173  | 14.7% | 19.5% | 222  | 19.1% | 24.9 |
| Mississippi   | 515  | 5.7  | 38   | 7.4%  | 11.9% | 155  | 29.3% | 46.2 |
| Missouri      | 2558 | 14   | 384  | 14.5% | 16.7% | 220  | 8.2%  | 12.6 |
| Montana       | 128  | 4.1  | 17   | 13.3% | 19.8% | 13   | 10.2% | 33.7 |
| Nebraska      | 158  | 2.8  | 24   | 13.9% | 19.5% | 67   | 41.1% | 35.0 |
| Nevada        | 1239 | 14   | 183  | 13.4% | 14.2% | 382  | 29.1% | 37.5 |
| New Hampshire | 1241 | 31   | 128  | 10.0% | 16.5% | 94   | 7.5%  | 41.2 |
| New Jersey    | 4240 | 15.8 | 832  | 19.2% | 16.0% | 963  | 22.2% | 36.5 |

|                           |       |      |            |       |       |            |       |      |
|---------------------------|-------|------|------------|-------|-------|------------|-------|------|
| New Mexico                | 1032  | 16.5 | 227        | 21.1% | 12.9% | 350        | 32.7% | 31.5 |
| New York                  | 8399  | 14.1 | 1607       | 18.8% | 16.7% | 2399       | 28.0% | 27.3 |
| North Carolina            | 4630  | 15.2 | 601        | 12.7% | 13.8% | 1387       | 29.5% | 45.3 |
| North Dakota              | 123   | 5.4  | 17         | 13.0% | 24.1% | 16         | 13.0% | 31.1 |
| Ohio                      | 10604 | 30.4 | 1350       | 12.4% | 18.2% | 1579       | 14.4% | 41.3 |
| Oklahoma                  | 1259  | 10.7 | 145        | 10.8% | 13.1% | 281        | 22.0% | 44.5 |
| Oregon                    | 987   | 8    | 122        | 11.9% | 16.6% | 93         | 9.1%  | 31.4 |
| Pennsylvania              | 6145  | 16   | 701        | 11.2% | 17.0% | 1080       | 17.3% | 46.1 |
| Rhode Island              | 810   | 25.5 | 193        | 23.7% | 16.0% | 205        | 25.2% | 60.2 |
| South Carolina            | 1931  | 13   | 221        | 11.1% | 15.2% | 590        | 29.5% | 52.6 |
| South Dakota <sup>c</sup> | 104   | 4    | Suppressed | --    | 16.9% | Suppressed | --    | 28.0 |
| Tennessee                 | 3493  | 17.5 | 552        | 15.3% | 10.3% | 1462       | 40.6% | 61.4 |
| Texas                     | 4120  | 4.9  | 550        | 12.9% | 15.9% | 1186       | 28.3% | 29.8 |
| Utah                      | 1370  | 15   | 179        | 12.8% | 11.6% | 484        | 34.5% | 35.9 |
| Vermont                   | 294   | 15.7 | 40         | 13.3% | 17.2% | 28         | 9.2%  | 35.5 |
| Virginia                  | 3191  | 12.6 | 556        | 17.3% | 16.3% | 523        | 16.3% | 36.4 |

|               |      |      |     |       |       |     |       |      |
|---------------|------|------|-----|-------|-------|-----|-------|------|
| Washington    | 2143 | 9.8  | 347 | 15.8% | 16.1% | 382 | 17.5% | 27.1 |
| West Virginia | 2195 | 40   | 367 | 15.6% | 10.6% | 924 | 40.4% | 71.9 |
| Wisconsin     | 2414 | 13.9 | 389 | 15.8% | 22.9% | 635 | 25.8% | 33.4 |
| Wyoming       | 143  | 8.2  | 25  | 16.1% | 16.0% | 27  | 18.9% | 24.1 |

<sup>a</sup>definition of binge drinking: >4/5 drinks in one occasion for women/men respectively within the last 30 days and BRFSS source

<sup>b</sup>benzodiazepine state prescribing rates obtained from reference 17 in manuscript text

<sup>c</sup>South Dakota does not have high enough incidence (>10 cases) to report values.
